# Supplementary material for: Southern Annular Mode Persistence and Westerly Jet: A Reassessment Using High-Resolution Global Models
Source: Copernicus journal article supplement (doi:10.5194/egusphere-2025-666), 2025-02-21
Supplement: Supplementary file [file egusphere-2025-666-AC1-supplement.pdf]

**Response** to referees' comments on "Southern Annular Mode Persistence and Westerly Jet: A Reassessment Using High-Resolution Global Models" by Chen et al.

MS No.: egusphere-2025-666

MS type: Research article

## **Referee 1 (RC1)**

### **Overall Assessment**

This study explores the atmospheric and oceanic influences on modelled SAM persistence and its relationship with the latitude of the mid-latitude jet. The authors note the longstanding issue that CMIP models (including the latest suite: CMIP6) overestimate SAM persistence (quantified using the decorrelation timescale), particularly in early austral summer, which appears to be much improved when using high-resolution, eddy-resolving simulations from the EERIE project. This appears to be in part due to more realistic simulation of the jet position/distribution (CMIP models have tended to be too equatorward biased) but the importance of accurate SST representation is also clear. In fact, the authors show that AMIP model experiments of the EERIE simulations perform better than coupled experiments in terms of more realistically representing the jet position and SAM decorrelation timescale. Enhanced resolution of the EERIE simulations likely plays a role in the improvement relative to CMIP6 models but also improved model physics, particularly concerning ocean mesoscale eddies which appear to slightly enhance the SAM decorrelation timescale in early summer (at least for simulations run at 28 km resolution) according to sensitivity simulations performed. However, cancellation effects (e.g., atmospheric eddy feedback strength versus surface friction) make it difficult to ascertain which aspects help improve modelling of the SAM persistence. For instance, the decorrelation timescale is more realistic still in 9 versus 28 km AMIP simulations, yet the role of ocean mesoscale eddies in enhancing SAM persistence is not evident at this finer resolution. I found the study to be very well written, organised and logically structured. The Figures are clearly presented and straightforward to understand and the step-by-step computation of the different diagnostics examined will I think be much appreciated by many readers. The conclusions drawn are supported by the results shown, so I can recommend this be accepted for publication in Weather and Climate Dynamics. I include just a few comments for the authors to consider prior to acceptance.

## General Comments

I only had one main consideration for the authors which I found lacking in the paper. That is information of which CMIP6 models were considered (if supplementary information were to be provided, a table for this would be warranted). That is not to say that knowledge of which models lie where in the distributions shown (Figures 2 and 3) are important in understanding this work. But for others reading, it might be useful for them to know and the best way I feel to include this would be to show similar Figures with individual CMIP6 models indicated in supplementary information. Nevertheless, knowledge of which CMIP6 models lie where could help others or even the authors to comment upon whether commonalities such as shared model components or known biases more widely within the climate system might influence the results. So, I would encourage the authors to think about providing this information.

We would like to thank the reviewer for their insightful comments and will take them into account for the revised version of the manuscript.

Regarding the comment on the CMIP6 table, the following table will be added in the supplement:

| Model           | $\tau$ Annual | $\tau$ NDJ | Jet latitude Annual | Jet latitude NDJ |
|-----------------|---------------|------------|---------------------|------------------|
| TaiESM1         | 8.2           | 11.6       | -52.4               | -50.4            |
| AWI-ESM-1-1-LR  | 12.0          | 21.2       | -49.0               | -50.4            |
| AWI-ESM-1-REcoM | 14.1          | 25.1       | -49.7               | -50.4            |
| BCC-CSM2-MR     | 11.2          | 21.5       | -51.1               | -50.3            |
| BCC-ESM1        | 14.2          | 30.2       | -50.5               | -49.5            |
| FGOALS-f3-L     | 11.4          | 16.6       | -49.7               | -48.9            |
| FGOALS-g3       | 9.4           | 12.2       | -49.7               | -49.5            |
| CanESM5         | 10.2          | 14.5       | -49.6               | -49.8            |
| IITM-ESM        | 13.2          | 22.5       | -47.0               | -47.0            |
| CNRM-CM6-1      | 11.3          | 18.7       | -48.2               | -48.4            |

|                     |       |       |        |        |
|---------------------|-------|-------|--------|--------|
| CNRM-CM6-1-HR       | 9.8   | 12.6  | -45.8  | -46.2  |
| CNRM-ESM2-1         | 11.9  | 20.2  | -48.5  | -48.4  |
| ACCESS-CM2          | 13.9  | 27.0  | -50.1  | -49.6  |
| EC-Earth3           | 9.4   | 12.9  | -50.3  | -49.5  |
| MPI-ESM-1-2-<br>HAM | 12.7  | 24.3  | -49.9  | -49.7  |
| INM-CM4-8           | 9.2   | 9.5   | -51.7  | -53.4  |
| INM-CM5-0           | 10.7  | 15.2  | -50.3  | -52.0  |
| IPSL-CM6A-LR        | 12.7  | 22.9  | -49.2  | -48.9  |
| MIROC6              | 11.7  | 20.3  | -48.7  | -49.6  |
| MPI-ESM1-2-HR       | 11.9  | 15.6  | -48.8  | -48.4  |
| MPI-ESM1-2-LR       | 10.0  | 14.3  | -47.9  | -48.4  |
| MRI-ESM2-0          | 16.0  | 32.1  | -48.0  | -47.0  |
| GISS-E2-1-G (1)     | 13.2  | 23.4  | -51.1  | -50.9  |
| GISS-E2-1-G (2)     | 10.8  | 17.0  | -50.8  | -50.5  |
| CESM2               | 9.0   | 13.4  | -51.9  | -52.3  |
| CESM2-FV2           | 9.3   | 13.9  | -52.7  | -52.2  |
| CESM2-WACCM         | 11.6  | 16.3  | -52.0  | -51.9  |
| CESM2-WACCM-<br>FV2 | 11.18 | 17.31 | -52.25 | -51.70 |
| NorESM2-LM          | 7.09  | 9.60  | -52.64 | -51.60 |
| NorESM2-MM          | 9.09  | 13.03 | -52.56 | -52.16 |
| GFDL-CM4            | 9.24  | 12.43 | -48.98 | -48.68 |
| ERA5                | 7.88  | 10.92 | -51.11 | -50.39 |

Table S1: Annual and summer (DJF) decorrelation timescale and westerly jet position for the 31 studied CMIP6 models

## Specific Comments

L15: “a critical driver” → “a leading mode”? I wouldn’t consider the SAM to a driver itself, but more of a reflection of driving influences. Expressing it as a leading mode would be more scientifically accurate and consistent with earlier literature (e.g., Marshall, 2003; Marshall et al., 2022).

We thank the reviewer and agree with this comment. We will change the sentence as suggested.

L340-342: How reliable is the SAM derived from ERA5 pre-satellite era when comparing with the EERIE coupled simulations? Presumably the SAM is more reliably reconstructed after 1979 from ERA5 but maybe difficult to quantify how much of an improvement there would be. It may be worthy of further comment or caveating, however?

We agree that ERA5 is less reliable in the pre-satellite era and will comment on this accordingly in the revised version. Nevertheless, compared to other reanalysis datasets that extend backwards in time beyond 1979, ERA5 has been shown to agree best with available station observations prior to 1979 and after (Marshall et al., 2022). We will add a comment on that in the method section:

L203: “Among the reanalysis products that extend backwards in time beyond 1979 (ERA5, 20CRv3, JRA-55), *ERA5 is found to agree best with station observations and produces good representation of SAM, both before and after the advent of satellite sounder data (Marshall et al., 2022)*”

We will also highlight that the SAM is more reliably reconstructed after 1979:

L343:” Note however that there is relatively less confidence in the accuracy of the value of the SAM in ERA5 prior to the satellite era.”

L343-344: Suggesting that a relative minority of models are considerably worse in representing SAM decorrelation timescale than the rest of the pack. Did the authors investigate why this might be or were they at least able to note some commonalities in the most unrealistic models that might point to the cause(s)? For instance, could there be an association between too equatorward jet position and shared model components? Or

factors that may give plausibly give rise to the issue of realistic eddy feedback strength? It may be beyond the scope of the paper to delve into this, but others reading might be encouraged to look into this.

It is indeed something interesting to study. However, we did not identify obvious commonalities shared by the worse performing models (e.g. spatial resolution or warm bias over Antarctica or the Southern Ocean or shared components).

Previous studies using CMIP models have discussed the association between too equatorward jet position and models' issues to represent the SAM persistence (e.g., Bracegirdle 2020, Zhang 2021) and the related role of the eddy feedback strength. However, we have the feeling that a comprehensive study of the shared components of these models falls beyond the scope of the study, which focuses on the added value of the high-resolution EERIE models.

L477: "...a key driver..." → Again I think "...a leading mode..." would be more technically correct.

This will be replaced in the revised version:

*L 476-478: This study assesses the performance of new high-resolution global model simulations developed under the EERIE project in capturing the persistence of the Southern Annular Mode (SAM), **a leading mode** of climate variability in the Southern Hemisphere.*

## Technical Corrections

L52-53: "spring (MAM) and summer (JJA)". → "autumn (MAM) and winter (JJA)".

L153: "observation" → "observations" Table 1: Some font size inconsistencies noted.

L245: Tabulation before "Finally..."

The suggested technical corrections will be implemented in the revised version.

## Additional References

Bracegirdle, T. J., Holmes, C. R., Hosking, J. S., Marshall, G. J., Osman, M., Patterson, M., & Rackow, T. (2020). Improvements in circumpolar Southern Hemisphere extratropical atmospheric circulation in CMIP6 compared to CMIP5. *Earth and Space Science*, 7(6), e2019EA001065.

Marshall, G. J. (2003). Trends in the Southern Annular Mode from observations and reanalyses. *Journal of climate*, 16(24), 4134-4143, [https://doi.org/10.1175/15200442\(2003\)016<4134:TITSAM>2.0.CO;2](https://doi.org/10.1175/15200442(2003)016<4134:TITSAM>2.0.CO;2).

Marshall, G. J., Fogt, R. L., Turner, J., & Clem, K. R. (2022). Can current reanalyses accurately portray changes in Southern Annular Mode structure prior to 1979?. *Climate Dynamics*, 59(11), 3717-3740, <https://doi.org/10.1007/s00382-022-06292-3>.

Zhang, X., He, B., Liu, Y., Bao, Q., Zheng, F., Li, J., ... & Wu, G. (2022). Evaluation of the seasonality and spatial aspects of the Southern Annular Mode in CMIP6 models. *International Journal of Climatology*, 42(7), 3820-3837.

## Referee 2 (RC2)

"Southern Annular Mode Persistence and the Westerly Jet: A Reassessment Using High-Resolution Models" examines the relationship between SAM persistence, the climatological jet latitude, and the classic eddy-feedback parameter in both CMIP6 models and a new suite of high-ocean-resolution models (EERIE), with some added AMIP-style simulations with one EERIE model to help interpret the effects of increased resolution. The work finds that EERIE simulations have much lower bias in the SAM timescale than CMIP6, particularly in summer (traditionally the worst season). The bias is even lower in the AMIP simulations forced by observational SSTs, which suggests that ocean-atmospheric coupling may contribute to the bias. While these EERIE simulations have a lower bias and lower resolution than most CMIP6 models, the CMIP models do not show much dependence on horizontal resolution. Instead, previously established relationships relating the SAM timescale to the jet latitude seem to hold for the CMIP models. For EERIE models, this relationship breaks down, and the eddy-feedback parameter has better correlations with the annular mode timescale. When SST gradients are reduced in the AMIP style simulations, the persistence is reduced, although the cause is unclear.

I cannot recommend the paper to be published in its current form. With substantial revision and extended analysis, it could eventually be published, but the current state of the paper presents only a very marginal advancement in knowledge in the area of SAM timescales, and the results are challenging to interpret without more context in the literature and clearer interpretive frameworks.

Despite these criticisms, the paper does a few things well. First, I think the question is well-defined: what are the impacts of high-resolution atmosphere and ocean models, and their coupling, on SAM persistence? I also think they have the data available to address this question, but it needs to be much better utilized. They outline their methodology in a very reproducible way, and generally they follow the previous literature (to a point). The writing is of good quality and reasonably easy to follow.

My major concerns are summarized below; a detailed discussion follows. The novel contributions of this work are the analysis of high-resolution simulations, the SST sensitivity experiments, and the consideration of friction to explain intermodel differences. All of these contributions require serious improvement.

We would like to thank the Reviewer for the detailed and constructive evaluation of our manuscript and all the suggestions that we will include in the revised version. This additional material will broaden the scope of our study, which was initially focused on a mainly descriptive, standard evaluation of the SAM in a new set of high-resolution simulations. The

Reviewer underlines three novel contributions in our work and that all three require serious improvement. The way we will introduce those improvements is explained in detail below following each specific comment. The main changes are briefly summed up below:

1. We will discard spin-up simulations and replace the old shorter simulations with longer runs (ranging from 22-year to 65-year long) in our new analysis; and their SAM e-folding timescale estimation will be supplemented with the bootstrapping method.
2. We will expand the literature review and strengthen its connection to our results. This will include a broader discussion of the processes contributing to SAM persistence and an extended examination of the potential role of ocean mesoscales, providing a clearer justification for our AMIP sensitivity experiments using varied SST boundary conditions.
3. We will follow the reviewer's suggestions to modify our methods to estimate surface friction for SAM persistence and expand the relevant discussion.
4. We will adopt the suggested new method for the jet location estimation.

We also acknowledge that we cannot answer all the questions in a single study, but when it is not possible to have robust conclusions, we highlight it as well as the limitations of our study.

Regarding the analysis of high-resolution simulations: the simulations are all short (10 years) and frequently non-stationary (spin-up) or non-overlapping with the observational record. Given the long timescales required for SAM timescale convergence, the significant impacts of non-stationarity on the estimation of the timescale, and the potential for decadal and supra-decadal variability in the feedback itself (following the jet latitude), interpreting the difference between the EERIE simulations, ERA5, and CMIP6 is very challenging. Clearly the bias is reduced, but it is not clear at present whether this is due to artefacts, random chance, or physically meaningful reductions. This problem could be partially alleviated by carrying out the bootstrapping techniques used for the reanalysis for the EERIE simulations. Longer runs/overlapping time periods would be preferable, but given the computational expense involved the current simulations might be acceptable given appropriate explanation of the caveats involved.

Since the submission of our manuscript, new simulations are available. This allows us to analyze longer runs and to discard all the spin-up simulations that may have strong issues with stationarity. The changes of the simulations are highlighted in the table below:



|                                                                                        |                                                                       |                                                        |                               |                                   |
|----------------------------------------------------------------------------------------|-----------------------------------------------------------------------|--------------------------------------------------------|-------------------------------|-----------------------------------|
| Institution                                                                            | Alfred Wegener<br>Institute (AWI)                                     | Max Planck Institute<br>(MPI-M)                        | Met Office<br>(MO)            | ECMWF                             |
|                                                                                        | Coupled atmosphere-ocean models (eddy-rich)                           |                                                        |                               | Atmospheric<br>model              |
| System name                                                                            | IFS-FESOM2                                                            | ICON                                                   | HadGEM3-<br>GC5-EERIE         | IFS                               |
| Simulations<br>analyzed in the<br>initial<br>submission<br>(segments<br>period/length) | 1950spinup (31 yrs)<br>1950control (20 yrs)<br>Historical (1950–1969) | 1950spinup<br>Cycle 2<br>(11 yrs)                      | piControl<br>(30 yrs)         | Historical<br>(1980–2023)         |
| <b>Modified<br/>simulations in<br/>this revised<br/>manuscript</b>                     | <b>1950control (65 yrs)<br/>Historical (1950–<br/>2014)</b>           | <b>1950control (22 yrs)<br/>Historical (1950–1971)</b> | <b>piControl<br/>(30 yrs)</b> | <b>Historical<br/>(1980–2023)</b> |

We also applied bootstrapping to the EERIE simulations wherever applicable. Among all simulations analyzed, only the ICON 1950control simulation failed to produce a convergent fit across the 1,000 bootstrapped resamples, likely due to variability in the underlying autocorrelation structure. Consequently, we will add the standard deviation of the e-folding timescale ( $\tau$ ) to Figure 2 in the revised manuscript for all simulations except ICON 1950control (as shown in Fig. R2-1 below).

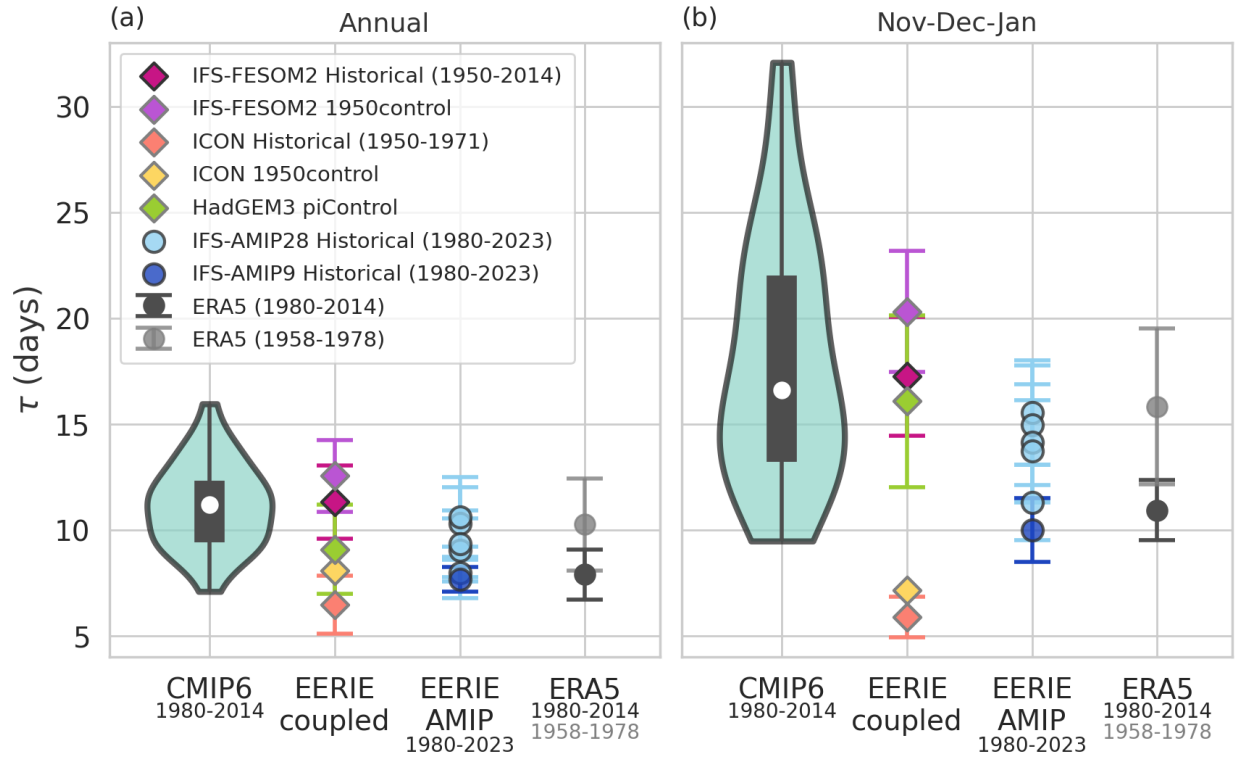

Figure R2-1. Distribution of  $\tau$  (days) in CMIP6, EERIE coupled, and EERIE atmosphere-only (AMIP) simulations. CMIP6 and EERIE AMIP are both historical simulations, with a fixed period indicated in the x-axis labels, and the EERIE coupled simulations cover varied periods as indicated in Table 1. ERA5 is analyzed for two time periods for references. CMIP6 results from 31 experiments are presented in violin plot, in which the width indicates the density of the data points, the thin gray vertical box in the middle shows the 25<sup>th</sup>–75<sup>th</sup> quantiles, and the white dot presents the median. For the rest, error bars are added wherever applicable to show the  $\pm 1$  standard deviation of  $\tau$  from the 1,000 bootstrap resamples.

Regarding the SST sensitivity experiments: these simulations require much clearer justification. At the moment, there is very little literature which would suggest that mesoscale SST gradients should affect the SAM persistence. There are some possible physical arguments, but they are not given here. One might argue that the fact that they do appear to influence the timescale in some small ensembles using one model is justification enough, but without a solid hypothesis to test, there is no definitive answer about why the change in timescale appears. It is entirely possible that it is by chance (no estimate of sampling uncertainty is provided). An incomplete argument discusses the role of surface friction, but it requires more explicit discussion of possible mechanisms. Some additional analysis on why persistence changes grounded in possible physical mechanisms would drastically strengthen the paper. It also needs to be much clearer why two different types of mesoscale features are included. My understanding of the feedback literature is that there is no reason to expect different results from the two, and they provide basically identical results.

As suggested by the Reviewer in a point below, we will add a paragraph in the revised version to better contextualize our work in the existing literature, specifically regarding the processes that control SAM persistence. After this paragraph, we will develop the justification of the sensitivity experiments (see below (\*) for a suggestion of the text addressing those points).

Regarding the consideration of friction: The literature has established methods for estimating surface friction using the model output available to the authors, but they are not followed here. Instead, the authors estimate the frictional contributions in a way which is difficult to connect to established theory of SAM persistence and the feedback parameter they calculate, and in a way that also cannot be interpreted easily across model resolutions. Its physical units are not transformed to be consistent with the momentum budget (their interpretive framework). Much more work needs to be done regarding friction if it is to be used to interpret these simulations.

We will expand significantly the discussion of the potential role of friction modifying the ones initially proposed to be consistent with the momentum budget terms and including an additional estimate as explained in detail below after the specific comments of the reviewer on this point.

Without significant improvements in its main areas of new contributions, the work only marginally advances knowledge in the area of SAM persistence.

With this substantial revision and extended analyses, we consider that we can address the main criticisms of the reviewer and provide substantial advances on the role of high resolution (specifically of oceanic processes) on the simulated SAM persistence.

Finally, the work would be much stronger if it was better contextualized in the SAM feedback literature. It follows the SAM model bias literature reasonably well. Specifically, it should consider a few key areas which have important bearing on its results: 1) the evidence that the "feedback" which appears in austral summer (the focus of this work) is likely not due to eddy-mean flow interaction but nonstationary stratospheric variability (e.g., Byrne et al. 2016). 2) the understanding of SAM feedback mechanisms [barotropic (e.g. Lorenz and Hartmann 2001, Chen et al. 2008) vs baroclinic (e.g., Robinson 2000) vs diabatic (Xia and Chang 2014, Smith et al. 2024)] and how those feedback mechanisms might explain the role of surface friction and SST gradients. 3) The evidence for propagation of the SAM and for the stronger connection between SAM propagation biases and persistence biases than for eddy-feedback biases and persistence biases (e.g., Lubis and Hassanzadeh 2023). 4) the

importance of the SAM timescale for climate predictability (e.g., Simpson and Polvani 2016, Ma et al. 2017, Hassanzadeh and Kuang 2019).

The main topic of our study is the ability of models to reproduce the observed SAM persistence and to determine if a better representation of meso-scale oceanic processes reduce the biases seen in lower resolution models. The introduction of our submitted manuscript was thus mainly devoted to those ‘model-related’ elements. However, we agree with the Reviewer that a longer discussion of the literature devoted to SAM persistence in general and specifically of the processes at the origin of this persistence would put our results in a broader context and justify more explicitly the choice of some of our analyses.

Consequently, we will add in the revised version a paragraph summarizing the main SAM feedback mechanisms. We will also come back to those mechanisms to discuss how mesoscale oceanic features could influence the SAM persistence (point first raised in another comment above). We will also add a sentence justifying the importance of the SAM persistence for predictability. This proposed paragraph is still relatively short considering the extensive literature on the subject. Describing all the mechanisms at play and discussing the uncertainties of those mechanisms would require a lengthy introduction considering the goal of the paper, but we will come back to the relevant points in other sections of the manuscript, in particular in the conclusion when discussing some of the limitations of our study.

Proposed paragraph to replace the lines 55-58 of the submitted version where we were defining SAM persistence:

(\*) ‘A key characteristic of SAM is its temporal persistence, referring to how long a given phase of the SAM (positive, negative or neutral) tends to last before transitioning. This long persistence is important as it provides a source of predictability at a timescale longer than the one associated with synoptic variability (e.g., Robinson 2000; Lorenz and Hartmann 2001, Simpson and Polvani 2016). The persistence is often measured as the decorrelation timescale (e-folding timescale) which indicates the average duration over which the SAM index remains strongly correlated with its past values. A standard explanation to SAM persistence is the reinforcement of the westerly flow anomalies by the atmospheric eddy momentum flux generated by those changes in the mean flow. Several mechanisms can be at the origin of this eddy-mean flow feedback, including barotropic processes related to anomalous wave propagation and breaking and baroclinic processes associated with eddy generation and enhanced baroclinicity in the lower troposphere in response to shift in the westerly flow (e.g., Robinson 2000, Lorenz and Hartmann 2001, Zurita-Gotor et al. 2014, Hassanzadeh and Kuang, 2019). The westerly flow anomalies also induce changes in the

diabatic heating and cooling due to latent heat release and cloud radiative effect that modify the temperature gradients, and potentially affecting SAM persistence (Xia and Chang 2014, Smith et al. 2024, Vishny et al. 2024). In addition to this eddy-mean flow feedback, SAM persistence can have an origin from the stratosphere, which introduce some non-stationary forcing to SAM. The main influence is likely in late spring and summer at the time of the seasonal breakdown of the stratospheric vortex (Simpson et al. 2011, Byrne et al. 2016, Byrne et al. 2017, Saggioro and Shepherd 2019). Furthermore, interactions between a stationary mode and a propagating mode of the zonal variability could also affect SAM persistence (Lubis and Hassanzadeh 2021, Sheshadri and Plumb 2017, Smith et al. 2024).'

‘Among all the processes that influence SAM persistence, one of the focuses here is the role of atmosphere-ocean exchanges. Surface heat fluxes modify the atmospheric temperature gradients, the boundary layer structure and thus diabatic heating of the atmospheric column as well as the low-level baroclinicity, which have both a demonstrated impact on SAM persistence (Xia and Chang 2014, Smith et al. 2024 Robinson 2000; Zurita-Gotor et al. 2014 ). Surface stress also plays a role as it tends to damp the westerly winds but also to enhance baroclinity and the baroclinic feedback (Robinson 2000, Zurita-Gotor 2014, Vishny et al. 2024). We will more specifically analyze the role of mesoscale oceanic features, which strongly impact the surface heat fluxes and surface stress in the Southern Ocean -a hotspot of mesoscale activity - (Frenger et al., 2013; Bishop et al. 2017) but whose potential influence on SAM persistence have been studied to a minimum to date.’

Other adjustments will be made to the introduction to avoid repetitions while including the new paragraphs.

### **Specific Comments**

Line 29: Assertion "eddy feedback is a better indicator" needs more justification and/or more clarity (better in what way? In what circumstances?)

We propose to replace better indicator by ‘useful indicator’.

Line 30-31: "These findings...offer insights": More specific language would be stronger (what insights?)

This sentence will be modified to be more specific.

Introduction: I think this discussion would be stronger if it included the significance of the persistence. As it stands, the section reviews the SAM and its significance for SH climate, what persistence is, some of its potential causes (non-stationarity is not discussed, see

following comment), its biases in GCMs, and some potential solutions for these biases. The problem is identified, but there exists a kind of motivational gap. The papers conclusions would be strengthened for unfamiliar readers if the significance of persistence was explicitly discussed.

As discussed above in response to the general comments, we will add a sentence in the introduction to mention the interest of persistence to predictability of Southern Hemisphere climate.

Lines 67-70, 79-95: An eddy-jet feedback is not the only possible source of persistence for the SAM. There is substantial literature published after the papers reviewed here which highlights the possibility for a "feedback" caused by non-stationarity induced by stratospheric forcing (Byrne et al. 2016, 2017, Saggioro and Shepherd 2019, etc.). This kind of forcing is especially important during early summer, the focus of this paper (see Byrne et al. 2016), when the stratospheric polar vortex breaks down. Thus, the feedback parameters computed here may not be responding to any internal tropospheric dynamics but the coupled troposphere-stratosphere system. The bias correction of Simpson et al. (2013a) suggests that this non-stationarity may not influence model biases, but it does not eliminate its possibility as one source of the feedback (Simpson et al. 2011 probably even supports this). Ma et al. 2017 further supports the notion of an eddy-feedback independent of non-stationarity, but a comprehensive discussion of this would improve the interpretation of the results.

As discussed above in response to the general comments, we will add a paragraph in the revised version explaining that eddy-jet feedback is not the only possible source of persistence. The potential impact for our evaluation of the eddy-jet feedback will be discussed in more detail in the methodology section (see below). A sentence will also be added in this paragraph on the specific impact of those processes on the biases on model persistence:

‘However, a wrong magnitude of the eddy feedback is not the only possible source for the too long SAM persistence in models. In particular, biased troposphere-stratosphere interactions or a too strong interaction between the stationary and propagating mode of the zonal wind could also induce a too long persistence (Lubis and Hassanzadeh 2021, 2023).’

Line 143: Which segments of spin-up runs are retained? How much time is allowed for equilibration before using it for analysis? Given the importance of the stratosphere for the SAM and the time for its equilibration ( $\sim 1$  year), I would hope at least the first year is excluded from the analysis

For the revision, we have discarded all the spin-up simulations from our analysis to alleviate the potential impact from the non-stationarity of the simulation on the  $\tau$  estimation. For the remaining EERIE control and historical simulations analyzed in this study, there is a 50-year spin-up time with the IFS-FESOM2 and ICON coupled models (following the design of HighResMIP) and a 200-year spin-up with the HadGEM3-GC5-EERIE model (following the design of CMIP6 DECK).

Line 148: I'm not fully convinced by this reasoning. In part, Byrne et al. (2016) show that non-stationarity does influence the calculation of eddy feedbacks, even given linear detrending. The spin-up simulations are certainly non-stationary, although that somewhat depends on whether some/how many of the initial years are omitted. The control simulations are likely not subject to this, but the historical simulations may be as well. Presumably they are more like reanalysis, but the point is that the differing periods may in fact influence the results beyond removing their climatological means (stationary or not). This non-stationary influence is notable in ERA5, where the bootstrapping Figure 2 shows substantially different decay timescales. In the case of NDJ, more likely influenced by non-stationarity, the two estimates are nearly non-overlapping. This is another argument that the analysis time period is not a trivial consideration. One way to partially address this concern is to bootstrap estimates for EERIE simulations, as done with ERA, particularly for simulations with few ensemble members (9km-AMIP in particular). Another concern is that the 10 years available for most simulations is not long enough to see strong convergence of the timescale, especially in coupled models (Gerber et al. 2008).

We mentioned in the submitted version that the proposed detrending and removal of the seasonal cycle did not remove all the effects of non-stationarity. This was likely too short. We will modify this paragraph explaining that the procedure we applied is standard, but we will insist more that non-stationarity implies serious limitations in our approach and how bootstrapping is a way to partially address this concern. As discussed above, we will also analyze longer simulations, discard the spin ups and apply the bootstrapping to most experiments (see for instance Fig. R2.1 above), reducing some of the limitations compared to the submitted version.

Lines 172-174: I would like more clarification about the choice to test the sensitivity of SAM persistence to different ocean mesoscale features. I do not understand the motivation very clearly. The zonal-mean, vertically-averaged zonal wind is a planetary-scale phenomenon, and while it is sensitive to ocean meso-scale features, I do not understand why it might be sensitive to one type over the other. The atmospheric eddies which power SAM and (potentially) its persistence are of a scale of 1000km, 10-100 times the scale of these features. While such temperature gradients can be important for lower-level baroclinicity

and the organization of convection, the large-scale drivers of SAM represent a further aggregation of these smaller scale dynamics. Indeed, there is currently no proposed mechanism (so far as I am aware) which argues that SAM should respond differently to these features. The idea that high-frequency SST gradients might strengthen the boundary layer heat flux, potentially enhancing boundary layer drag and strengthening the baroclinic feedback could be one argument, but it does not differentiate between eddies and fronts. In general, these results should be discussed in light of theories for baroclinic feedbacks on SAM persistence (Robinson 2000, Zurita-Gotor 2014, Zurita-Gotor et al. 2014). Diabatic feedbacks may also play a role here (Xia and Chang 2014, Smith et al. 2024).

We agree with the reviewer that there is no strong theoretical justification for separating the analysis by different ocean mesoscale features. The sensitivity experiments were originally designed to explore broader and under-studied questions under the EERIE project — specifically, to investigate “the relative importance of sharp SST gradients associated with ocean fronts and transient ocean eddies on the large-scale extratropical atmospheric circulation” (C. Roberts et al., 2024b). For simplicity, and to assess whether any major differences in the context of SAM persistence might warrant further investigation, we initially kept the features separated in the submitted version. However, we acknowledge that this separation may cause confusion, in the revised version we will present them as a single combined group. We will also develop in more details the physical processes that could explain a potential role of high-frequency SST gradients on SAM persistence in the introduction (see above)

Line 230: "for the same date in a calendar year". I think I know what this means, but more clarity would be better

Equation (1):  $y$  seems to be year, but it is not explicitly defined. The separation of  $t$  into  $d$ ,  $y$  could be more clearly explained (see previous comment)

Those two points will be clarified in the revised version.

Line 249: As mentioned previously, this should be repeated for simulations with few ensemble members (5 or less).

We have performed 1,000 bootstrap resampling iterations to estimate the sampling uncertainty for all EERIE simulations presented, and the results—where applicable—will be included in the revised manuscript (Fig. 2).

Figure 1: Other reviewers and readers may disagree with me, but I think Figure 1 belongs as supplemental materials. The freed up PU (publication unit) could be used much more



effectively for other topics, some of which already mentioned, some to be mentioned. A very large majority of WCD readers interested in SAM and SAM timescale know what the pattern looks like, and if not, it is easily found. A more useful figure might be comparing the pattern across models. A similar argument is true for the timeseries. The raw timeseries is not relevant to the analysis being performed. Both are referenced once, only in passing. Panel c is more useful, but it is a visual explanation of e-folding time, which will be familiar to many readers, climate-oriented and not. Figure 1 could be more useful if it also depicted how the eddy feedback parameter (b) is calculated, as this is a more complex and less familiar calculation. Even with such an inclusion, I have a hard time justifying including Figure 1 in the main body of the text.

We agree that Figure 1 is relatively simple and does not present new findings beyond what is already available in the literature. However, based on previous interactions with researchers less familiar with SAM persistence, we have found that the concept of e-folding time is not always intuitive. Given that our manuscript contains a limited number of figures, we believe that including this introductory illustration may aid some readers without distracting more specialized audiences. To further justify its inclusion, we have added subplots to Figure 1 that illustrate how the eddy feedback strength is calculated (R2-2).

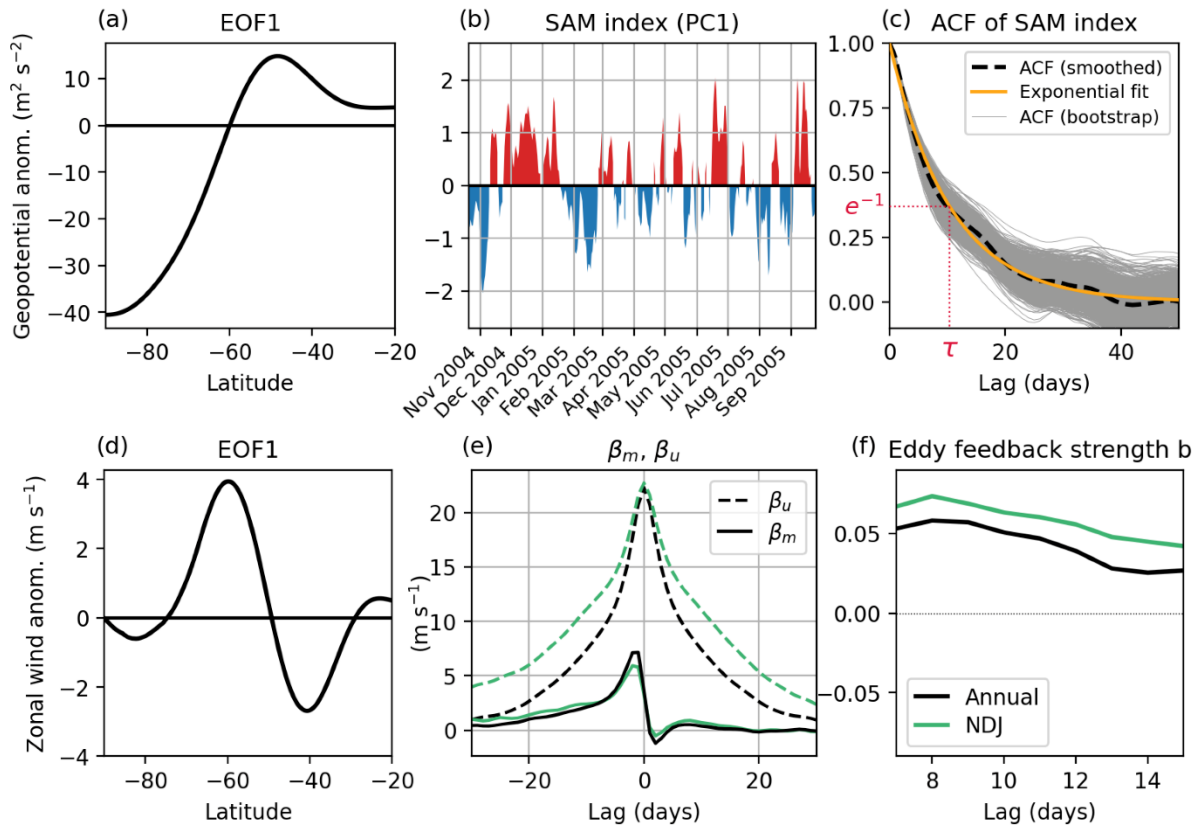

Figure R2-2. Example of the SAM decorrelation timescale and eddy feedback strength calculation based on

ERA5: (a) The first EOF pattern based on geopotential; (b) Associated first PC1 time series (only a partial segment is shown here); (c) Autocorrelation function (ACF) of the SAM index (smoothed with a Gaussian filter) shown for a given day of the year (black dashed), and an exponential fit (yellow). The e-folding timescale is denoted as  $\tau$ . The ACF is repeated 1,000 times (gray) with the bootstrap sampling with replacement. (d) Same as (a) but based on vertically averaged zonal wind. (e) Lagged regression of [u]s and [m]s onto the SAM index. (f) Eddy feedback strength  $b$  for lags 7–14 days. Green for NDJ and black for annual-averaged results. Line 265: Because many of your models have different resolutions (particularly CMIP5 vs EERIE, you mention regridding CMIP5 to the same grid, but not EERIE), I would highly suggest following Menzel et al. (2019) or Barnes and Polvani (2015) and doing quadratic interpolation around the jet maximum to define the jet latitude. This will alleviate some of the degeneracy (models with identical jet latitudes) in Figure 3 and is consistent with the literature.

As suggested by the reviewer, we have performed a quadratic interpolation around the jet latitude maximum. We did not observe any major difference in the CMIP6 simulations. We will update the figures in the revised version, and add some clarifications in sec. 3.2:

*L266: The westerly jet is diagnosed following Menzel et al. (2019) and Barnes and Polvani (2015). We apply a quadratic fit method on the monthly mean zonally averaged 850-hPa zonal wind at the latitude where the maximum value is found between 75S and 10S and the four adjacent latitudes of the model. The latitude where the maximum value of the quadratic fit is found defines the position of the tropospheric westerly jet.*

Line 273: The switch from geopotential height for defining the timescale to zonal wind for defining the feedback is not without caveats. The assumption here is that the wind relevant for the SAM (and its feedbacks) is the geostrophic wind. Recently, however, Smith et al. (2024) demonstrate that SAM has significant eddy-feedbacks from the ageostrophic momentum fluxes which are leading-order in DJF in MERRA2. Vishny et al. (2024) also find important contributions to persistence from the ageostrophically-driven mean meridional circulation in idealized simulations. Thus, the imputation that models whose decay timescale is based on geopotential height will be consistent with the feedback from full (geostrophic+ageostrophic) zonal wind is probable, but not guaranteed. I think there is enough literature supporting the use of both (geopotential height and zonal wind) methods that it is not reasonable to redo the ACF calculations using zonal wind, but I do think it is worth acknowledging the geostrophic assumption and its limitations.

As suggested, we will add in the revised version a discussion of the limitations of the geostrophic assumption.

Line 278: I think the choice of three levels by Simpson et al. (2013b) was not intended to be the ideal, rather it was the best available information at the time (CMIP3). The vertical

structure of SAM can be quite nuanced despite its barotropic nature (Wall et al. 2022, Sheshadri et al. 2018), and a significant fraction of the eddy momentum flux necessary for the feedback exists above 250 hPa (Nie et al. 2014, Sheshadri et al. 2018). I suspect much more than those three levels are available for CMIP6, and their inclusion would strengthen this analysis.

We agree that including additional vertical levels would enhance the analysis. However, this choice was limited by computational constraints associated with the high-resolution Eerie simulations. Although this diagnostic focuses solely on the AMIP simulations, there are still a total of 18 simulations, encompassing three sensitivity experiments conducted at resolutions of 9 km and 28 km. The 28 km experiments, in particular, include five ensemble members each. As this is an international project that must balance the requirements of multiple teams within limited storage capacity, the 6-hourly data availability is currently restricted to only three vertical levels. To maintain consistency and enable comparison, we intentionally requested the same three levels used by Simpson et al. (2013b), allowing for a direct check against their results.

Line 300: The assumption of the Simpson framework is that the PCs are uncorrelated. Sheshadri and Plumb (2017), Lubis and Hassanzadeh (2020), Lubis and Hassanzadeh (2023), and Smith et al. (2024) have all shown this is not the case. Specifically, Sheshadri and Plumb (2017), Lubis and Hassanzadeh (2020), and Lubis and Hassanzadeh (2023) have shown that the coupling between EOF1 and EOF2 influences the SAM persistence timescale and the estimation of the eddy feedback parameter, and that the SAM timescale in CMIP6 models shows a strong dependence on the strength of the coupling between EOF1 and EOF2 (as measured by SAM's propagation period, see Lubis and Hassanzadeh 2023, Figure 7). Without examination of the coupling between modes across models, the spread in eddy-feedback parameters is difficult to interpret.

To address this comment, we will include the following paragraph in the revised version.

The approach followed here assumes that analyzing only the first PC is a good approximation to study SAM persistence. However, although the PCs are uncorrelated by construction on short timescale, this is not the case at longer lags and the coupling between the first two components influences SAM persistence (Sheshadri and Plumb 2017, Lubis and Hassanzadeh 2021, and Lubis and Hassanzadeh 2023). Analyzing only the first PC brings thus clear limitations in our analysis of the model spread in simulated SAM persistence. Furthermore, positive regression coefficients could be caused by non-stationarity of the series and in particular by interaction with the stratosphere and not just by eddy mean flow interactions. This introduces biases in the estimate of eddy feedback, particularly in late spring and summer (Byrne et al. 2016, Byrne et al. 2017), although this

does not necessarily prevent using the regression method (Ma et al. 2017). The methodology is thus imperfect, but it provides an interpretative framework for the difference between the simulations and allows a comparison with earlier studies. We will test here how useful it could be to analyze the behavior of the different modes, keeping in mind the possible caveats.

Line 310-325: I have two concerns involving the friction term. First, more could be done to properly estimate it and, second, utilize it in the interpretation of the results. I will begin with its estimation. Given  $\tau$  as the surface stress, one can estimate the resulting torque as  $d(\rho \cdot \tau)/dz$  (see Vallis 2006, eq. 2.270),  $\rho$  being density. If you only have  $\tau$  at the surface, because you are vertically-integrating it, you can simply use the surface value and divide by the depth (in meters) of the atmospheric column, as the turbulent stress is likely zero at the model top. This faux-integration also yields a net negative sign (since the stress decreases with height), and should be of the right units ( $\text{N/m}^2/\text{kg}\cdot\text{m}^3/\text{m}=\text{m/s}^2$ ) and the correct sign. This approach should still be approximately valid in the case that the "surface" stress is actually the output turbulent stress from the boundary layer scheme for the full boundary layer.

The only information available about friction in the simulations is the surface stress. This is the reason why we use this quantity in our correlation analyses in the submitted version (Figure 4d-h). Nevertheless, we agree with the Reviewer that this quantity does not have the same unity as the terms in the momentum budget (equation 3) of the submitted version. This was mentioned as a note in line 293 of the submitted manuscript but performing the integration as suggested by the Reviewer is more elegant. We will thus follow the suggestion in the revised version. This will not change our correlations but will provide a term whose magnitude can be interpreted more easily. It is also more convenient for the comparison with other estimates of the friction term as explained below.

However, the friction in Lorenz and Hartmann (2001; and in other studies building on this framework) is generally parameterized as Rayleigh drag with a constant damping timescale. LH2001 explain in their Appendix A how to estimate it from timeseries of  $m$  and  $z$ . Since both of these fields are used in this analysis, it should be possible to estimate a friction via Rayleigh drag. This has two key benefits: 1) it can be used to validate the friction estimated from the stress, and triple checked against the residual of the momentum budget, evaluated from your equation (3), which should also be possible. In my experience, the residual usually matches the Rayleigh drag quite well. The second benefit is that it is useful for the interpretation of the feedback parameter, which I discuss more later.

Lorenz and Hartmann (2001) quantified the eddy feedback and the frictional term using spectral analysis and cross covariance. Here, we follow a different approach to estimate the feedback parameter, following Simpson et al. (2013) (see for instance the appendix of

Simpson et al. 2013b for a justification). Computing the frictional term following Lorenz and Hartmann (2001) may thus be confusing and would require additional technical justification in the manuscript. This would also introduce more complexity in our discussion and so we suggest not applying this methodology. By contrast, we will compute the friction term as a residual of the momentum budget, as suggested. This will allow us to double-check our results (using 2 of the 3 proposed methods). We can then obtain a damping timescale, equivalent to the one corresponding to a Raileigh drag, by performing the ratio between the zonal index (in m/s) and the estimated friction term (in m/s<sup>2</sup>).

A final issue with the estimation of the friction (no matter which method, preferably at least 2 of the 3) is that its projection value is proportional to the square root of the number of latitudes, and thus its magnitude should not be compared directly with simulations with different horizontal resolution. This is true for all the budget terms, but the feedback parameter is resolution-independent because it involves the ratio of two budget terms. To understand why, consider a simplified version of your equation (2) where  $\mathbf{W} = \mathbf{I}$  (the identity). If  $\mathbf{e}$  is a (square-) integrable function  $f(\lambda)$ , sampled on an equally spaced grid (reasonable for GCM output), its Euclidean norm will be proportional to the square-root of the integral of  $[f(\lambda)]^2$  over latitude ( $\lambda$ ), divided by the grid spacing (since we multiplied by the grid spacing to convert the sum into an integral). The integral should converge to the same value regardless of the resolution for most smoothly-varying, well-resolved  $f$  (again reasonable at even coarse GCM resolutions). However, the inverse of the grid spacing is proportional to the number of latitudes  $N$  (if the grid is evenly spaced). Thus the norm of  $\mathbf{e}$  is proportional to  $\sqrt{N}$ . The multiplication of  $\mathbf{X}\mathbf{e}$  is proportional to  $N$  (not the square root), by the same logic (because  $\mathbf{e}$  is an orthogonal basis, the only component of  $\mathbf{X}$  that survives the integration is proportional to  $\mathbf{e}$ , and the product is proportional to  $\mathbf{e}\mathbf{e}$ ). However,  $\mathbf{X}\mathbf{e}$  has no square root, and thus  $\mathbf{X}\mathbf{e}/\sqrt{\mathbf{e}\mathbf{e}}$  is proportional to  $\sqrt{N}$ . See a small example which should generalize well as the attached image. Note that including a non-identity weighting matrix  $\mathbf{W} \neq \mathbf{I}$  does not change this, it simply adds another term into the integration. One could divide by  $\sqrt{N}$  to alleviate this, or use integrals in the top and bottom instead. Or, one could divide the friction by the zonal wind projection as done for the feedback parameter. At that point, you may as well compute the damping timescale following the literature (LH2001, Appendix A).

We would like to thank the Reviewer for spotting this point. In the submitted version, all the results are interpolated on a  $1/4^\circ$  grid before estimating the friction term (this will be stated explicitly in the revised version) so the different experiments can be compared, and the original grid size does not introduce a relative bias in this comparison. Nevertheless, as the issue remains for the absolute numbers, we will follow the suggestion to show the damping

timescale, which does not have this problem when estimated from the ratio of the zonal wind projection and the friction term projection.

The second friction-related issue is with the interpretation of the feedback. Following LH2001, the eddy feedback parameter ( $b$ ) lengthens the effective timescale for the SAM by  $t_f/(1-b*t_f)$ , where  $t_f$  is the frictional timescale. Thus, both the eddy feedback and the frictional timescale can effect SAM's persistence, and if models have differing frictional timescales, it could also explain differences in their persistence. In theory, one could see if this effective timescale  $t_f/(1-b*t_f)$  followed the autocorrelation timescale more closely (I suspect it would), but the model bias literature (Gerber et al. 2008, Kidston and Gerber 2010) generally does not follow this convention, so I don't think this is strictly necessary. However, it may give a better interpretive framework for the friction to plot the frictional timescale (rather than the projection) and use this LH2001 relation to explain how the frictional timescale interacts with the eddy-feedback parameter to determine the total timescale.

As we will discuss the friction timescale in the revised version (see above), we can then test if combining estimates of friction timescale and eddy feedback as suggested provides a better interpretation of the difference in SAM persistence between the simulations.

Figure 2 (caption): Please describe the violin plot in more detail; I don't believe they are common enough to assume they can be interpreted properly without explanation.

We will modify the Figure caption to

“Figure R2-1. Distribution of  $\tau$  (days) in CMIP6, EERIE coupled, and EERIE atmosphere-only (AMIP) simulations. CMIP6 and EERIE AMIP are both historical simulations, with a fixed period indicated in the x-axis labels, and the EERIE coupled simulations cover varied periods as indicated in Table 1. ERA5 is analyzed for two time periods for references. **CMIP6 results from 31 experiments are presented in violin plot, in which the width indicates the density of the data points, the thin gray vertical box in the middle shows the 25th –75th quantiles, and the white dot presents the median.** For the rest, error bars are added wherever applicable to show the  $\pm 1$  standard deviation of  $\tau$  from the 1,000 bootstrap resamples.”

Lines 396-398: I think this point on the interpretation of the IFS-AMIP experiments requires more discussion and computation. These are an IC ensemble from the same GCM with the same boundary conditions, and thus represent internal variability of the same mean climate in a way that isn't the case for comparisons across the CMIP models. For example, you could likely run 5 more IC ensembles, and you might get a completely different pattern between

jet latitude and e-folding timescale. But I don't think that somehow contradicts the expectation that the two should be positively correlated due to the stronger wave reflection (and weaker feedback) of more poleward jets (Barnes and Hartmann 2010, Lorenz 2023). Despite this, according to the convergence estimates of Gerber et al. (2008), the 40 years of AMIP simulations should be enough to constrain the decorrelation timescale within a day, and 4 of the ensemble members are within one day of their mean. This is where I think bootstrapped estimates of the sampling uncertainty could help resolve this question of whether sampling uncertainty can explain the lack of relationship, or whether this is indeed a breakdown of the expected theory.

We agree with the Reviewer that the IC ensemble is different from CMIP models as the boundary conditions are the same for all the IC members while ensemble of coupled models can have very different SST patterns for instance. This will be made more explicit in the revised version by mentioning 'internal atmospheric variability' instead of just internal variability'. We also agree that there is no reason to consider that this difference contradicts the expectation that jet latitude and e-folding time should be positively correlated. One hypothesis we put forward is that, when the position of the jet is well captured (as in all IFS-AMIP experiments), the difference in jet position is too small between the different experiments (compared for instance with CMIP models) to explain the difference in decorrelation timescale and other factors dominates, but this is only a speculation at this stage. We will modify this paragraph in the revised version to make this clearer, we will also check how the bootstrapping influences the robustness of our conclusions and insist that the 'documented bias relationship between  $\tau$  and  $\lambda_0$  in the literature' is based on strong physical arguments.

Figure 3: When uncertainty exists in both the dependent and independent variables of a regression, it may be more appropriate to use a different type of regression than least-squares, especially if the uncertainties are correlated (see Pendergrass and Kao 2022, and York 2004 for an alternative).

We agree that a more sophisticated regression method could be more precise, but we have chosen here the standard least-squares for simplicity as in some previous studies.

Line 415: Sample size of one, not enough evidence to support conclusion (bootstrapping would help)

We will add the standard deviation of  $\tau$  for all AMIP simulations using bootstrap resampling. The decrease in  $\tau$  with higher resolution is not particularly robust on the annual-mean scale, as the estimated  $\tau$  in the 9-km simulation falls within (though toward the lower end of) the



range covered by the 28-km simulations (Fig. 2a). However, during the NDJ season, the reduction in  $\tau$  for the 9-km simulation is more pronounced, with its estimated range extended outside those of the 28-km simulations (Fig. 2b).

Lines 425-430: Some connection to existing feedback mechanisms would be appropriate here

We will add some discussion on such connection in the revised manuscript.

Lines 441-449: See previous comments regarding friction

This section will be updated using the new results. In particular, we will add references to feedback mechanisms and more details regarding friction.

Line 462: Is the convection parameterization turned off at 9km? Stronger latent heating in the 9km run could create a stronger negative diabatic feedback (Xia and Chang 2014), decreasing the persistence

The convection parameterization is still active at 9 km, as at 27 km resolution, consistently with the convection parameterization settings applied in ECMWF operational forecasts.

Figure 4: Panels (f), (g) and (h) should be greatly simplified, maybe down to one panel (or even a table), showing the simulation on one axis and the value of the x axis on the other. The decay timescales are identical, and two points is not enough to infer any relationship, so the current scatter plots visually complicate the comparison between simulations. Readers will understand why they do not follow (b), (c), and (d), no need to artificially fit that pattern.

Following the reviewer's suggestions, we will remove the panels e-f from the submitted version and combine the results of the 9-km members to the 28-km members (originally shown on the panels b-d). An example figure is shown here as Fig. R2-3, but we will update it with the new results in the revised manuscript.



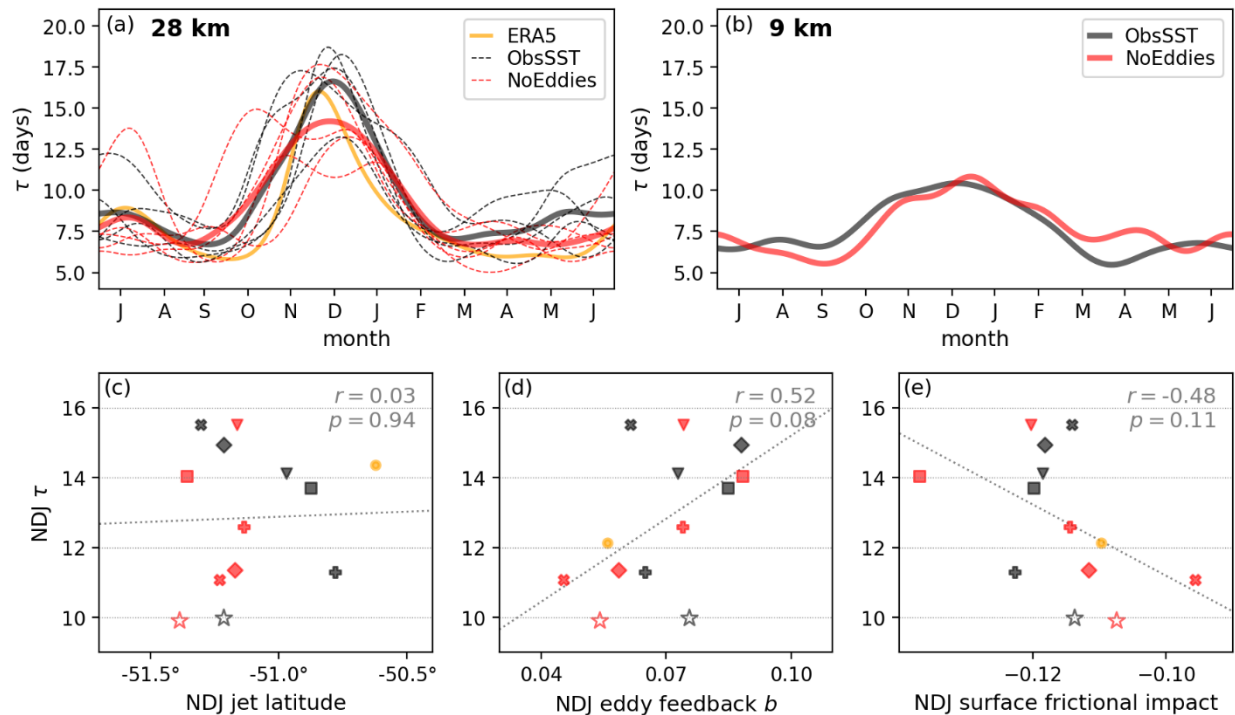

Figure R2-3. (a) SAM decorrelation timescale ( $\tau$ ) as a function of month for IFS-AMIP 28km simulations (dashed lines for ensemble members and solid lines for the ensemble means; experiments indicated in the legend) and ERA5 (yellow). (b) Same as (a) but for 9 km. (c) Scatter plot of  $\tau$  (days) and westerly jet latitude (filled-color markers are for 28 km members, and the unfilled stars are for 9 km simulations). (d)–(e) Similar to (c) but for the eddy feedback strength and frictional effects associated with SAM, respectively. In (b)–(d), the gray dotted line represents the linear regression fit, and the correlation coefficient and p value are indicated in the top-right corner.

Line 492: For the 10 year, coupled EERIE simulations, I'm not convinced this is long enough to really reduce the sampling uncertainty, which converges very slowly (see Gerber et al. 2008). Bootstrapped measures would help alleviate this concern; without such attempts, it is hard to interpret the difference between the EERIE simulations and the longer CMIP6 simulations (and the longer IFS-AMIP simulations for that matter).

As our responses above, we will analyze extended simulations (65 years with IFS-FESOM2, 30 years with HadGEM3, and 22 years with ICON) and apply bootstrapping resampling to strengthen our analysis.

Line 540: please clarify: better indicator of what?

A better indicator of SAM persistence. This will be specified in the revised version (see the response to the next comment).

Line 541: "more statistically significantly" If I recall, while the p-value was small, the result was not significant. I think significance is too binary for this language. I would stick with language which discusses what a small p-value means (the relationship is unlikely to be due to random chance).

The lower the p-value is, the lower the probability of getting that result if the null hypothesis were true. The null hypothesis here is that there is no correlation between the two variables. Therefore, with a smaller p, we can reject the null hypothesis and conclude that there is a linear relationship between the two variables with a higher confidence. We will rephrase the lines from

“It is worth noting that the eddy feedback strength appears to be a better indicator than the mean-state jet latitude  $\lambda_0$ , linking positively and more statistically significantly to the simulated summertime  $\tau$  among the IFS AMIP simulations.”

to

“It is worth noting that, compared to the mean-state jet latitude ( $\lambda_0$ ), the eddy feedback strength shows a stronger correlation with early-summer  $\tau$ , as indicated by a larger magnitude of the Pearson correlation coefficient and a lower p-value (i.e., higher statistical confidence) across the IFS AMIP simulations. ”

Line 522: I'm not convinced the path forward is that promising from these results. A higher resolution atmosphere helps. That is good. But it does not seem to benefit from being coupled (bias improves in AMIP) and it does not seem to benefit from mesoscale ocean features (smoothed SST runs have lower bias). Improvements in jet latitude at these resolutions do not seem to help either. However, the climate community will want to run coupled models for the estimation of climate variability and sensitivity for the foreseeable future. If other models behave like IFS (a big assumption), it is likely models will be stuck with some irreducible bias in SAM timescale. Perhaps I am too pessimistic. If so, please help me understand what other path these results suggest.

Suggesting perspectives at the end of a study is always a difficult task and bears many uncertainties. Based on the Reviewer's comments and of the new analysis carried out, we will modify this paragraph to be more explicit about the main implications of our study. We agree that the AMIP simulations seem to indicate that two-way coupling between the atmosphere and the ocean or the mesoscale eddies are not essential to reproduce well SAM persistence. On the other hand, those experiences emphasized that a good representation of sea surface temperature is critical. Many oceanic studies have demonstrated the key role of mesoscale eddies in the Southern Ocean and that eddy-permitting models often have

larger SST biases than either models with parameterized eddy fluxes or eddy-rich models (e.g. Storkey et al. 2025). The impact of mesoscale eddies may be only indirect but still essential.

### Technical Corrections

Lines 73, 90, 240: Simpson 2013 referenced without a/b

Lines 376-379: This sentence "However, it is also possible... more critical" could benefit from more clarity, including maybe breaking into smaller sentences.

Lines 511-514: Rephrasing (and separating into smaller sentences) would improve clarity here

The suggested technical corrections will be implemented in the revised version.

### References

Barnes, E. A., & Hartmann, D. L. (2010). Testing a theory for the effect of latitude on the persistence of eddy-driven jets using CMIP3 simulations. *Geophysical Research Letters*, 37(15). <https://doi.org/10.1029/2010GL044144>

Barnes, E. A., & Polvani, L. M. (2015). CMIP5 Projections of Arctic Amplification, of the North American/North Atlantic Circulation, and of Their Relationship. *Journal of Climate*, 28(13), 5254–5271. <https://doi.org/10.1175/JCLI-D-14-00589.1>

Bishop, S. P., Small, R. J., Bryan, F. O. & Tomas, R. A. Scale dependence of midlatitude air–sea interaction. *J. Clim.* 30, 8207–8221. <https://doi.org/10.1175/JCLI-D-17-0159.1> (2017).

Byrne, N. J., Shepherd, T. G., Woollings, T., & Plumb, R. A. (2016). Annular modes and apparent eddy feedbacks in the Southern Hemisphere. *Geophysical Research Letters*, 43(8), 3897–3902. <https://doi.org/10.1002/2016GL068851>

Byrne, N. J., Shepherd, T. G., Woollings, T., & Plumb, R. A. (2017). Nonstationarity in Southern Hemisphere Climate Variability Associated with the Seasonal Breakdown of the Stratospheric Polar Vortex. *Journal of Climate*, 30(18), 7125–7139. <https://doi.org/10.1175/JCLI-D-17-0097.1>

Chen, G., Lu, J., & Frierson, D. M. W. (2008). Phase Speed Spectra and the Latitude of Surface Westerlies: Interannual Variability and Global Warming Trend. *Journal of Climate*, 21(22), 5942–5959. <https://doi.org/10.1175/2008JCLI2306.1>

Frenger, I. et al., 2013. Imprint of Southern Ocean eddies on winds, clouds and rainfall. *Nature Geoscience* 6, 608–612.

Gerber, E. P., Voronin, S., & Polvani, L. M. (2008). Testing the Annular Mode Autocorrelation Time Scale in Simple Atmospheric General Circulation Models. *Monthly Weather Review*, 136(4), 1523–1536. <https://doi.org/10.1175/2007MWR2211.1>

Hassanzadeh, P., & Kuang, Z. (2019). Quantifying the Annular Mode Dynamics in an Idealized Atmosphere. *Journal of the Atmospheric Sciences*, 76(4), 1107–1124. <https://doi.org/10.1175/jas-d-18-0268.1>

Kidston, J., & Gerber, E. P. (2010). Intermodel variability of the poleward shift of the austral jet stream in the CMIP3 integrations linked to biases in 20th century climatology. *Geophysical Research Letters*, 37(9). <https://doi.org/10.1029/2010GL042873>

Lorenz, D. J. (2023). A Simple Mechanistic Model of Wave–Mean Flow Feedbacks, Poleward Jet Shifts, and the Annular Mode. *Journal of the Atmospheric Sciences*, 80(2), 549–568. <https://doi.org/10.1175/JAS-D-22-0056.1>

Lorenz, D. J., & Hartmann, D. L. (2001). Eddy–Zonal Flow Feedback in the Southern Hemisphere. *Journal of the Atmospheric Sciences*, 58(21), 3312–3327. [https://doi.org/10.1175/1520-0469\(2001\)058<3312:EZFFIT>2.0.CO;2](https://doi.org/10.1175/1520-0469(2001)058<3312:EZFFIT>2.0.CO;2)

Lubis, S. W., & Hassanzadeh, P. (2020). An Eddy–Zonal Flow Feedback Model for Propagating Annular Modes. *Journal of the Atmospheric Sciences*, 78(1), 249–267. <https://doi.org/10.1175/JAS-D-20-0214.1>

Lubis, S. W., & Hassanzadeh, P. (2023). The Intrinsic 150-Day Periodicity of the Southern Hemisphere Extratropical Large-Scale Atmospheric Circulation. *AGU Advances*, 4(3), e2022AV000833. <https://doi.org/10.1029/2022AV000833>

Ma, D., Hassanzadeh, P., & Kuang, Z. (2017). Quantifying the Eddy–Jet Feedback Strength of the Annular Mode in an Idealized GCM and Reanalysis Data. *Journal of the Atmospheric Sciences*, 74(2), 393–407. <https://doi.org/10.1175/JAS-D-16-0157.1>

Menzel, M. E., Waugh, D., & Grise, K. (2019). Disconnect Between Hadley Cell and Subtropical Jet Variability and Response to Increased CO<sub>2</sub>. *Geophysical Research Letters*, 46(12), 7045–7053. <https://doi.org/10.1029/2019GL083345>

Nie, Y., Zhang, Y., Chen, G., Yang, X.-Q., & Burrows, D. A. (2014). Quantifying barotropic and baroclinic eddy feedbacks in the persistence of the Southern Annular Mode. *Geophysical Research Letters*, 41(23), 8636–8644. <https://doi.org/10.1002/2014GL062210>

Roberts, C., Aengenheyster, M., Roberts, M., 2024b. Description of EERIE idealised atmosphere-only simulations. <https://doi.org/10.5281/ZENODO.14514510>

Robinson, W. A. (2000). A Baroclinic Mechanism for the Eddy Feedback on the Zonal Index. *Journal of the Atmospheric Sciences*, 57(3), 415–422. [https://doi.org/10.1175/1520-0469\(2000\)057<0415:ABMFTE>2.0.CO;2](https://doi.org/10.1175/1520-0469(2000)057<0415:ABMFTE>2.0.CO;2)

Saggioro, E., & Shepherd, T. G. (2019). Quantifying the Timescale and Strength of Southern Hemisphere Intraseasonal Stratosphere-troposphere Coupling. *Geophysical Research Letters*, 46(22), 13479–13487. <https://doi.org/10.1029/2019GL084763>

Sheshadri, A., & Plumb, R. A. (2017). Propagating Annular Modes: Empirical Orthogonal Functions, Principal Oscillation Patterns, and Time Scales. *Journal of the Atmospheric Sciences*, 74(5), 1345–1361. <https://doi.org/10.1175/JAS-D-16-0291.1>

Sheshadri, A., Plumb, R. A., Lindgren, E. A., & Domeisen, D. I. V. (2018). The Vertical Structure of Annular Modes. *Journal of the Atmospheric Sciences*, 75(10), 3507–3519. <https://doi.org/10.1175/JAS-D-17-0399.1>

Simpson, I. R., Hitchcock, P., Shepherd, T. G., & Scinocca, J. F. (2011). Stratospheric variability and tropospheric annular-mode timescales. *Geophysical Research Letters*, 38(20). <https://doi.org/10.1029/2011GL049304>

Simpson, Isla R., & Polvani, L. M. (2016). Revisiting the relationship between jet position, forced response, and annular mode variability in the southern midlatitudes. *Geophysical Research Letters*, 43(6), 2896–2903. <https://doi.org/10.1002/2016GL067989>

Simpson, Isla R., Hitchcock, P., Shepherd, T. G., & Scinocca, J. F. (2013). Southern Annular Mode Dynamics in Observations and Models. Part I: The Influence of Climatological Zonal Wind Biases in a Comprehensive GCM. *Journal of Climate*, 26(11), 3953–3967. <https://doi.org/10.1175/JCLI-D-12-00348.1>

Simpson, Isla R., Shepherd, T. G., Hitchcock, P., & Scinocca, J. F. (2013). Southern Annular Mode Dynamics in Observations and Models. Part II: Eddy Feedbacks. *Journal of Climate*, 26(14), 5220–5241. <https://doi.org/10.1175/JCLI-D-12-00495.1>

Smith, S., Lu, J., & Staten, P. W. (2024). Diabatic Eddy Forcing Increases Persistence and Opposes Propagation of the Southern Annular Mode in MERRA-2. *Journal of the Atmospheric Sciences*, 81(4), 743–764. <https://doi.org/10.1175/JAS-D-23-0019.1>

Storkey D, P. Mathiot, M. J. Bell, D. Copsey, C. Guiavarc’h, H. T. Hewitt, J. Ridley, and Ma. J. Roberts (2025). Resolution dependence of interlinked Southern Ocean biases in global coupled HadGEM3 models. *Geosci. Model Dev.*, 18, 2725–2745, 2025. <https://doi.org/10.5194/gmd-18-2725-2025>

Vallis, G. K. (2006). *Atmospheric and Oceanic Fluid Dynamics* (1st ed.). Cambridge University Press.

Vishny, D. N., Wall, C. J., & Lutsko, N. J. (2024). Impact of Atmospheric Cloud Radiative Effects on Annular Mode Persistence in Idealized Simulations. *Geophysical Research Letters*, 51(15), e2024GL109420. <https://doi.org/10.1029/2024GL109420>

Wall, C. J., Lutsko, N. J., & Vishny, D. N. (2022). Revisiting Cloud Radiative Heating and the Southern Annular Mode. *Geophysical Research Letters*, 49(19), e2022GL100463. <https://doi.org/10.1029/2022GL100463>

Xia, X., & Chang, E. K. M. (2014). Diabatic Damping of Zonal Index Variations. *Journal of the Atmospheric Sciences*, 71(8), 3090–3105. <https://doi.org/10.1175/JAS-D-13-0292.1>

York, D., Evensen, N. M., Martínez, M. L., & De Basabe Delgado, J. (2004). Unified equations for the slope, intercept, and standard errors of the best straight line. *American Journal of Physics*, 72(3), 367–375. <https://doi.org/10.1119/1.1632486>

Zurita-Gotor, P. (2014). On the Sensitivity of Zonal-Index Persistence to Friction. *Journal of the Atmospheric Sciences*, 71(10), 3788–3800. <https://doi.org/10.1175/JAS-D-14-0067.1>

Zurita-Gotor, P., Blanco-Fuentes, J., & Gerber, E. P. (2014). The Impact of Baroclinic Eddy Feedback on the Persistence of Jet Variability in the Two-Layer Model. *Journal of the Atmospheric Sciences*, 71(1), 410–429. <https://doi.org/10.1175/JAS-D-13-0102.1>
